# Supplementary material
Source: PubMed Central journal article supplement (PMC2899913)
Supplement: pp.110.157123_1.pdf [file pp.110.157123_1.pdf]

## Supplemental Data

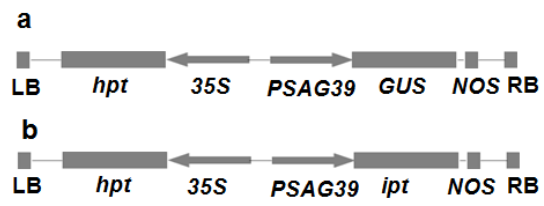

**Figure S1.** The native promoter constructs of  $P_{SAG39}$ . a, Diagram of the  $P_{SAG39}:GUS$  construct; b, Diagram of the  $P_{SAG39}:ipt$  construct.

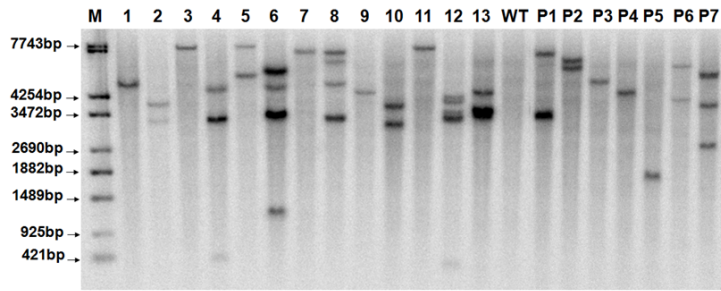

**Figure S2.** The copy number of T<sub>0</sub> transformants determined by Southern blot analysis. M,  $\lambda$ -ECoT14 I ; Lanes 1 to 13, transgenic plants harboring  $P_{SAG39}:GUS$ ; P1 to P7, transgenic plants harboring  $P_{SAG39}:ipt$ ; WT, wild-type plants.

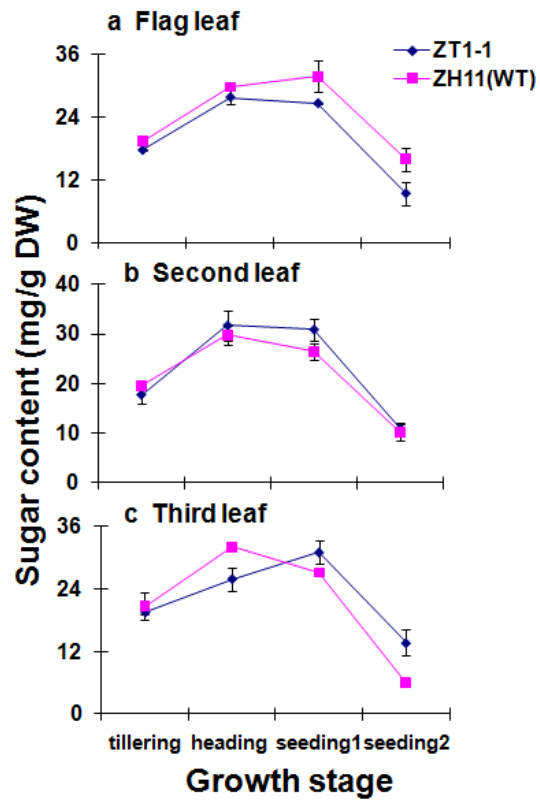

**Figure S3.** Analysis of sugar content in wild-type and transgenic plants. a, Flag leaf; b, Second leaf; c, Third leaf. Error bars refer to  $\pm$  SEM of three replicates, with each replicate including 10 plants.

**Table S1** Primers for  $P_{SAG39}$  and a series of truncated promoters

| Vector                | truncated promoter | Primer   | Forward primer (5'-3') <sup>1</sup>            | Reverse primer (5'-3') <sup>2</sup>          |
|-----------------------|--------------------|----------|------------------------------------------------|----------------------------------------------|
| $P_{SAG39}$<br>:GUS   | P39                | P39-F/R  | <u>ggctctagaattcataagag</u><br>agggaggcacacg   | <u>gcagatctaccatgaggat</u><br>ggcgaagagcagag |
| $P_{SAG39-62}$ :GUS   | Pf06               | Pf06-F/R | <u>ggctctagaattcaacatcg</u><br>tacacgcaccgta   | <u>gcagatctaccatgaggat</u><br>ggcgaagagcagag |
| $P_{SAG39-239}$ :GUS  | Pf2                | Pf2-F/R  | <u>ggctctagaattcacttcac</u><br>ggctacgcagact   | <u>gcagatctaccatgaggat</u><br>ggcgaagagcagag |
| $P_{SAG39-493}$ :GUS  | Pf5                | Pf5-F/R  | <u>ggctctagaattccaatgt</u><br>gcaaaactctcca    | <u>gcagatctaccatgaggat</u><br>ggcgaagagcagag |
| $P_{SAG39-719}$ :GUS  | Pf7                | Pf7-F/R  | <u>ggctctagaattccgcacat</u><br>atacaccaacctt   | <u>gcagatctaccatgaggat</u><br>ggcgaagagcagag |
| $P_{SAG39-1100}$ :GUS | Pf10               | Pf10-F/R | <u>ggctctagaattc gatgaga</u><br>tgggaggagggtga | <u>gcagatctaccatgaggat</u><br>ggcgaagagcagag |
| $P_{SAG39-1300}$ :GUS | Pf13               | Pf13-F/R | <u>ggctctagaattcggagag</u><br>agcgtcggatatga   | <u>gcagatctaccatgaggat</u><br>ggcgaagagcagag |
| $P_{SAG39-1600}$ :GUS | Pf16               | Pf16-F/R | <u>ggctctagaattccgtggg</u><br>gaat tttgtgagtt  | <u>gcagatctaccatgaggat</u><br>ggcgaagagcagag |

<sup>1</sup> The underlined sites are the sites for the digestion of restriction enzymes *EcoRI*

<sup>2</sup> The underlined sites are the sites for the digestion of restriction enzymes *Bgl II*

**Table S2** The sequence of probes for electrophoretic mobility shift assay

| Probe | Sequence (5'-3')                                  | Position       |
|-------|---------------------------------------------------|----------------|
| E1    | ACATACACCCATATAAACGCACATATAC                      | -701 to -674   |
| E2    | TAATTAGCCGTAAATACGAGTACT                          | -562 to -539   |
| E3    | GCAAAACTCTCCATAGGATAAA                            | -451 to -430   |
| E4    | TCAACAAACCCCCACAGCATAATTTAAAATGTAGGC<br>GTCTGTGTT | -299 to -255   |
| E5    | AAGAGAGGGAGGCACACGGCTGGGAGGCCTAGCTG<br>CTGAGTC    | -2018 to -1977 |
| E6    | CTTGACCACCGTGGCTCGACGGG                           | -1899 to -1877 |
| E7    | GGAGGAGTGAGGAGGCGAGGAGGAGGAGGGGG<br>AGCGAAGC      | -1420 to -1379 |
| E8    | AGGGAGGAGCGAGGAGGCGAGGAGGACCG                     | -1349 to -1321 |
| E3.1  | GCAAAACT                                          | -451 to -444   |
| E3.2  | CTCTCCAT                                          | -445 to -438   |
| E3.3  | TAGGATAAA                                         | -438 to -430   |
| E6.1  | TCGACGGG                                          | -1884 to -1877 |
| E6.2  | ACCGTGGCT                                         | -1892 to -1884 |
| E6.3  | CTTGACCA                                          | -1899 to -1892 |

**Table S3** The sequence of primers for RT-PCR or probes for Northern blotting

| Gene locus id or accession number | Primer       | Forward primer (5'-3') | Reverse primer (5'-3') |
|-----------------------------------|--------------|------------------------|------------------------|
| AB025109                          | ipt-F/R      | gcctctggtgaagggtatcat  | gcatccatgaatcaactta    |
| AF372831                          | Oshxk1-F/R   | agcttgaatcctggagagca   | accaccegaagacgagacatc  |
| AY220486                          | Osinv4-F/R   | aagatgaacgcggaggagta   | tgcagcctccaaatttatcc   |
| AY342320                          | Oscin3-F/R   | ccaagcagctcaatgtcact   | tactcctccgcttcatctt    |
| NM_001074422                      | Osnadh-F/R   | cagaacatggtgcagcagac   | tgatcaccgagttcacgttc   |
| AF276703                          | Osinv2-F/R   | cgctaaagattgggagctg    | gcctaaattgtggcattg     |
| EF122480                          | Oss2-F/R     | gagagcctctacccttgct    | ggcaacagcctggttacaat   |
| NM_001074422                      | Osht-F/R     | acgtggagaccaagaacgag   | tgtagtagagcacgcctgtg   |
| L34271                            | osmads1-F/R  | tccatatgtcctggcaagat   | aagagagcacgcacgtactt   |
| AF058697                          | osmads14-F/R | tcctatgcagaaaaggctcct  | ggacgaagccaaaatatacac  |
| AF091458                          | osmads18-F/R | ccaaactggatgcacttcag   | atcaatatcgctggaagatg   |
| AB003328                          | osmads50-F/R | aaagctgacgctgatggttg   | gagatccagcttattcctgg   |
| NM_001063913                      | Hd1-F/R      | ttctcctccaaagattcc     | catacgccttcttgtttca    |
| NM_001063395                      | Hd3a-F/R     | atggccggaagtggcagggac  | atcgatcgggatcatcgtag   |
| NM_001048755                      | OSGI-F/R     | tggagaaaggttgatgatgc   | gatagacggcacttcagcagat |
| AL606590                          | sag39i-F/R   | acaatgaggctgcccttatg   | aaaggctcacttgctcatgg   |
| AF234297.1                        | gus-F/R      | ggcggaacagtctctgatta   | cgaaatattcccgtgcactt   |
| NM_001053188                      | actin-F/R    | ccttaccgacaaccttatga   | atggagttgtatggcttc     |
